# Supplementary material for: Novel MoO2/carbon hierarchical nano/microcomposites: synthesis, characterization, solid state transformations and thiophene HDS activity
Source: Royal Society of Chemistry journal article supplement (doi:10.1039/c2dt31248d), 2012-11-27
Supplement: c2dt31248d.pdf [file c2dt31248d.pdf]

### Supplementary Material.

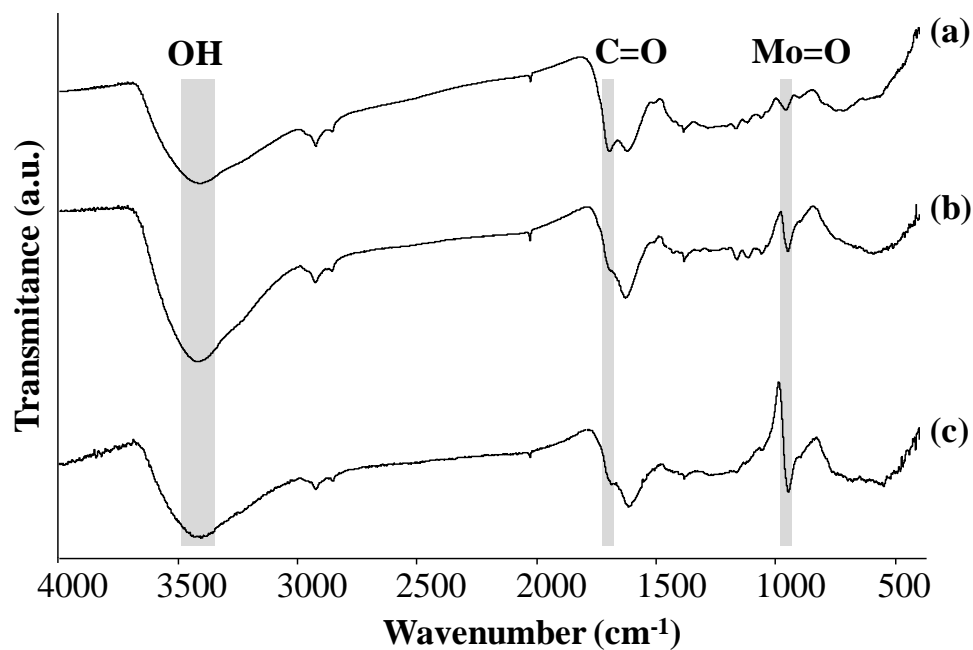

**Figure S1.** FT-IR spectra of the materials obtained from hydrothermal synthesis of glucose:PMA with molar ratios 40.5:1 (a), 20:1 (b) and 13.5:1 (c).

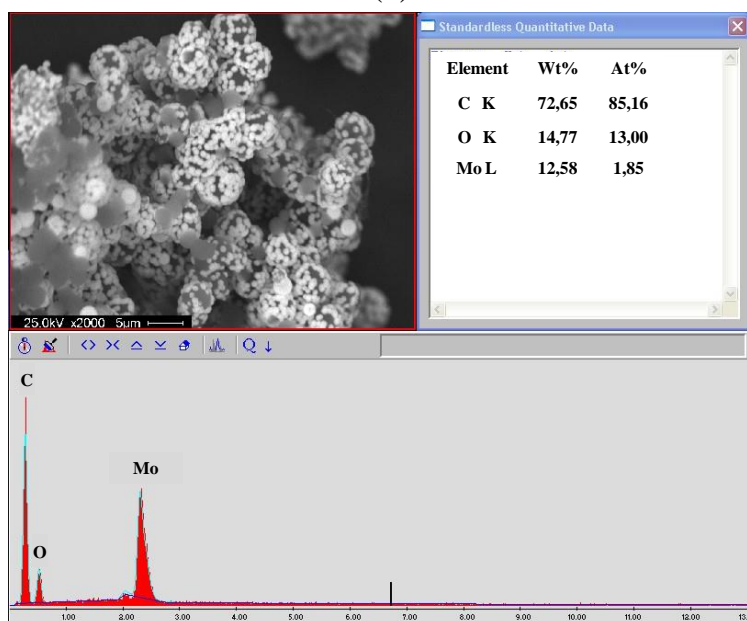

**Figure S2.** EDS analysis of the composite derived from hydrothermal synthesis of glucose:PMA with molar ratio of 20:1

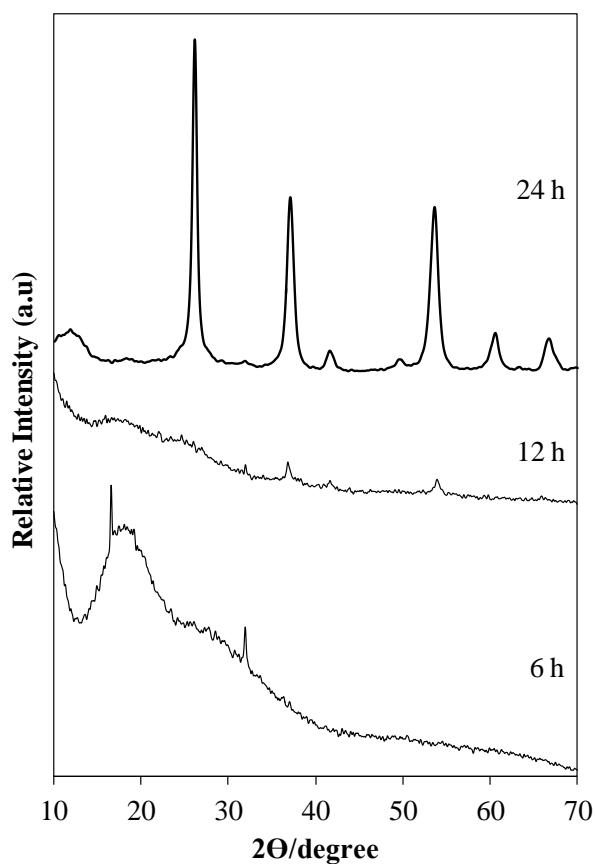

**Figure S3.** XRPD patterns of the materials obtained from hydrothermal synthesis of glucose and PMA using different reaction times.

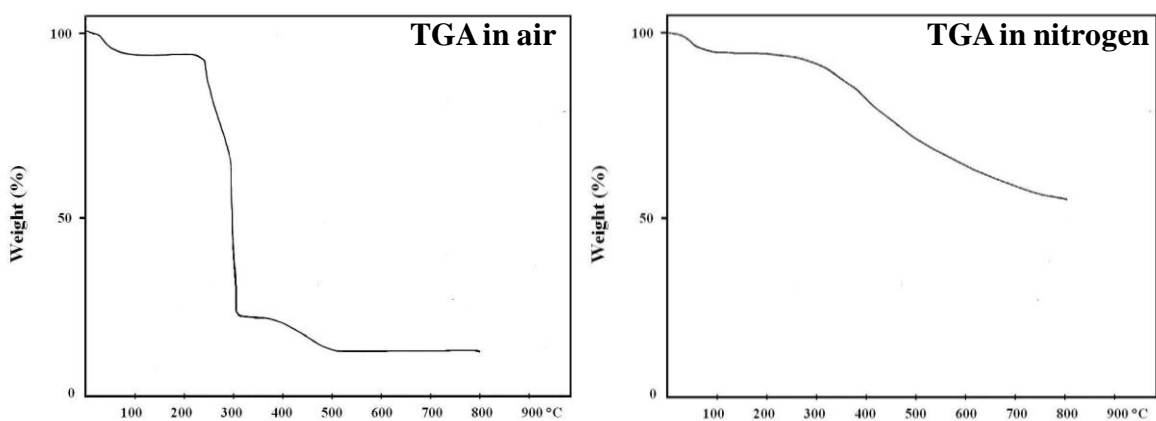

**Figure S4.** TGA analysis in air and nitrogen of the composite derived from hydrothermal synthesis of glucose:PMA with molar ratio of 20:1

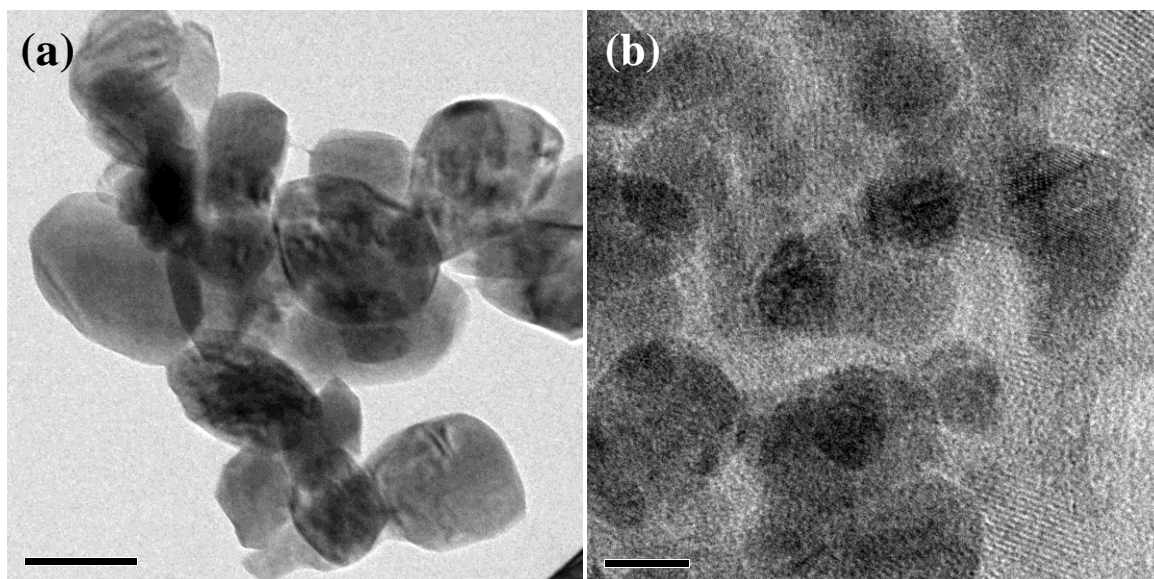

**Figure S5.** TEM images of nanoplates MoO<sub>3</sub> formed under calcination of MoO<sub>2</sub>/C strawberry-like composites

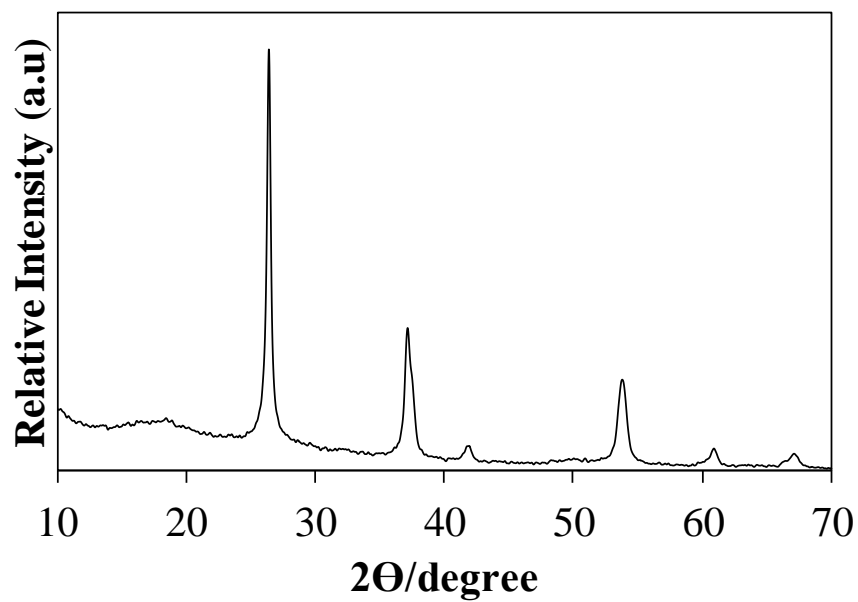

**Figure S6.** XRPD patterns of the composite derived from glucose:PMA molar ratio 20:1 calcined in air for 5 minutes.

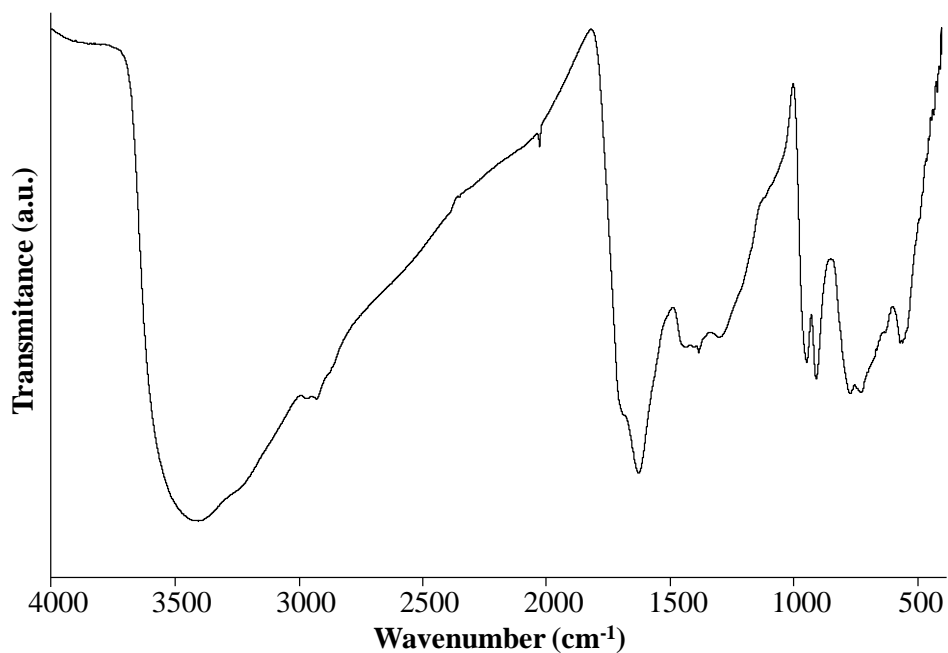

**Figure S7.** FT-IR spectra of the hybrid material obtained from hydrothermal synthesis of glucose and AHM.

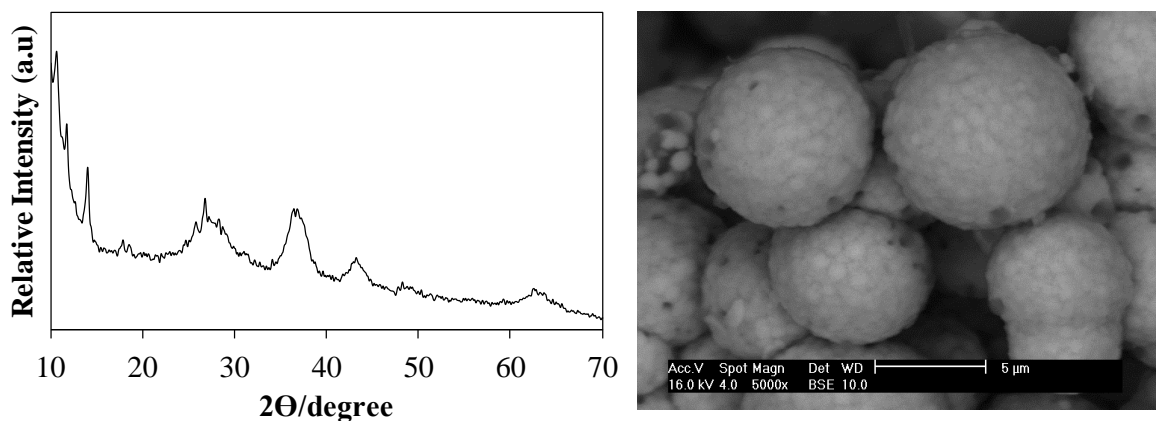

**Figure S8.** XRPD pattern and SEM image of the material obtained from nitriding treatment (at 700 °C) of MoO<sub>2</sub>/C-N<sub>2</sub> composites.

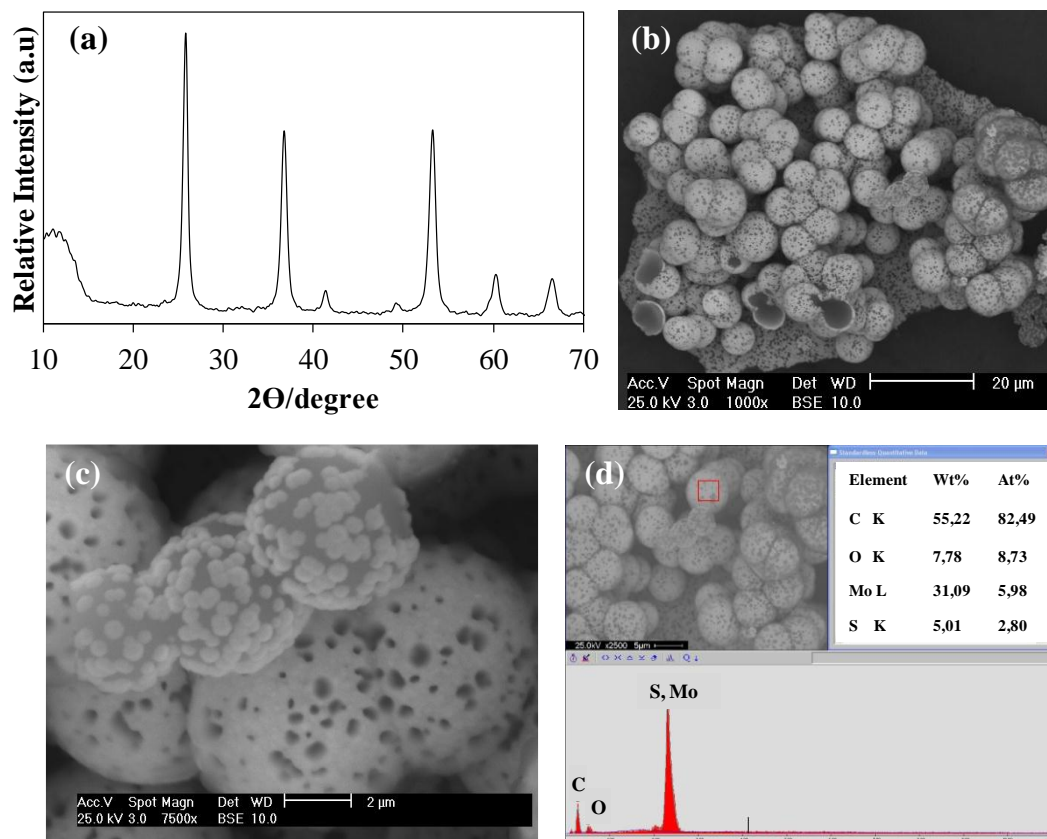

**Figure S9.** XRPD pattern (a), SEM images (b,c) and EDS analysis (d) of the material obtained from sulfiding treatment of MoO<sub>2</sub>/C composites.

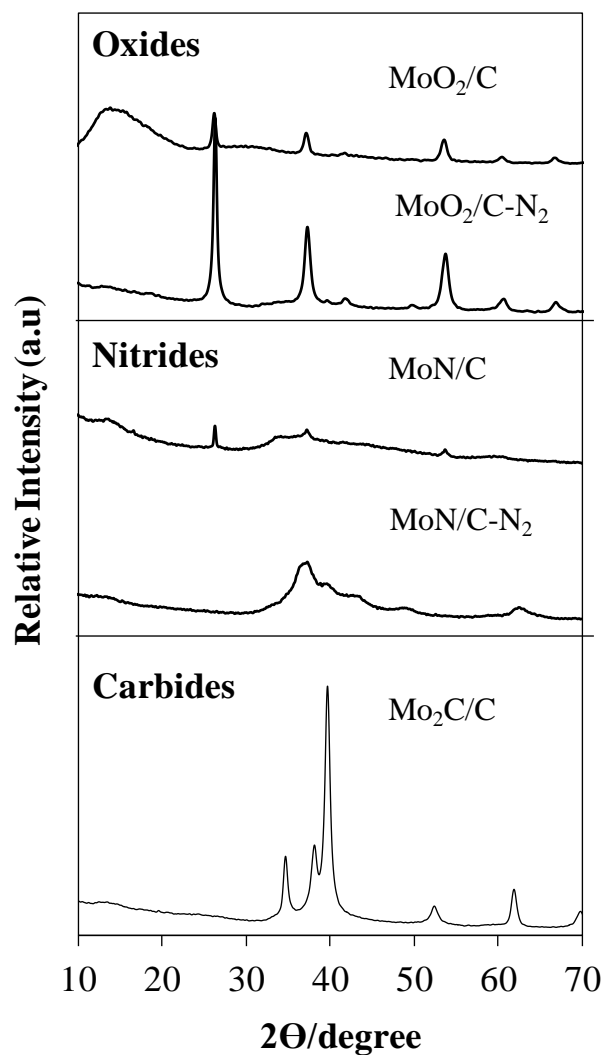

**Figure S10.** XRPD patterns of the catalysts after HDS reactions

**Table S1.** Chemical elemental analysis of the catalysts after HDS reactions

| Catalysts after HDS                | Morphology | %C | %O | %H | %S | %N |
|------------------------------------|------------|----|----|----|----|----|
| MoN/C-N <sub>2</sub>               | Core-Shell | 29 | 30 | 2  | 3  | 3  |
| MoN/C                              | Strawberry | 25 | 35 | 1  | 7  | 2  |
| Mo <sub>2</sub> C/C                | Strawberry | 34 | 32 | 1  | 3  | -  |
| MoO <sub>2</sub> /C-N <sub>2</sub> | Urchin     | 36 | 28 | 2  | 4  | -  |
| MoO <sub>2</sub> /C                | Strawberry | 25 | 40 | 2  | 3  | -  |
